# Supplementary material for: Detection of the Endangered Stone Crayfish Austropotamobius torrentium (Schrank, 1803) and Its Congeneric A. pallipes in Its Last Italian Biotope by eDNA Analysis
Source: MDPI journal article supplement (doi:10.3390/d14030205), 2022-03-10
Supplement: s1 [file s1]

Archive with 1 entries (1 files):
- diversity-1610210-supplementary.pdf
